# Supplementary material for: Associated Factors of Spontaneous Hemorrhage in Brain Metastases in Patients with Lung Adenocarcinoma
Source: MDPI journal article supplement (doi:10.3390/cancers15030619), 2023-01-19

**Table S1.** Comparison of TKI subtypes between non-hemorrhagic and hemorrhagic BMs.

|                                                | Non-hemorrhagic<br>BMs (N=19) | Hemorrhagic<br>BMs (N=40) | Total (N=39) | p    |
|------------------------------------------------|-------------------------------|---------------------------|--------------|------|
| TKI subtype                                    |                               |                           |              | 0.66 |
| 1 <sup>st</sup> generation                     | 9 (47.4%)                     | 18 (45.0%)                | 27 (45.8%)   |      |
| 2 <sup>nd</sup> generation                     | 10 (52.6%)                    | 22 (55.0%)                | 32 (54.2%)   |      |
|                                                | Non-hemorrhagic<br>BMs (N=19) | Hemorrhagic<br>BMs (N=53) | Total (N=72) | p    |
| TKI subtype                                    |                               |                           |              | 0.14 |
| 1 <sup>st</sup> and 2 <sup>nd</sup> generation | 19 (100.0%)                   | 40 (75.5%)                | 59 (81.9%)   |      |
| 3 <sup>rd</sup> generation                     | 0 (0.0%)                      | 13 (24.5%)                | 13 (18.1%)   |      |

**Figure S1.** Overall survival after brain metastasis (OSBM) depending on intracranial hemorrhage in patients with single BM (A) and multiple BMs (B).

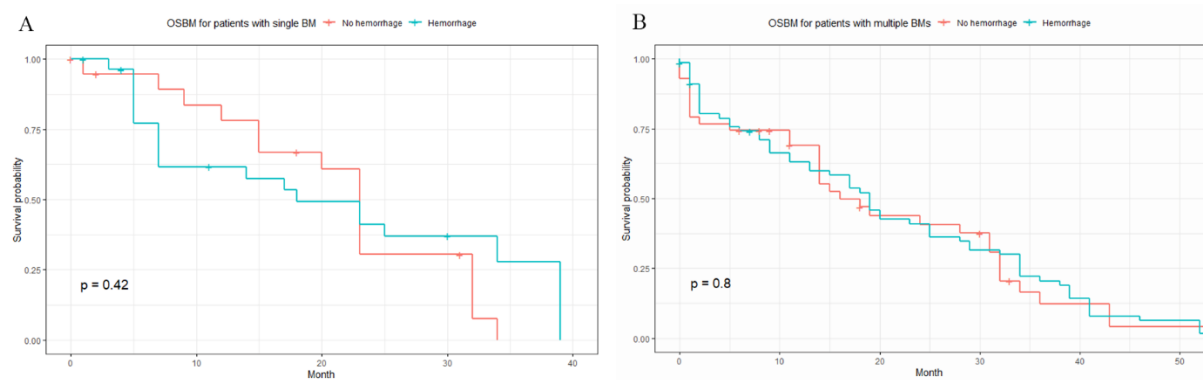

Supplement: s1 [file s1]
